# Supplementary material for: Investigating EFL learners’ reading comprehension processes across multiple choice and short answer tasks
Source: publisher site journal article supplement (doi:10.1515/applirev-2024-0025), 2025-08-11
Supplement: Supplementary file 1 [file j_applirev-2024-0025_suppl_001.docx]

The participants’ eye-movement data in the two tasks

|  | Indicator | Q1 | Q2 | Q3 | Q4 | Q5 | Q6 | Q7 | Q8 | Q9 | Q10 |
| --- | --- | --- | --- | --- | --- | --- | --- | --- | --- | --- | --- |
| **MC** | Source DOF mean | **7974.53** | **9989.74** | **12300.40** | **9946.77** | **32756.95** | **6748.93** | **5858.67** | **11518.65** | **9186.35** | **33959.05** |
| St. deviation | 4988.870 | 5074.042 | 6711.687 | 6775.533 | 47518.531 | 4044.082 | 4568.684 | 5727.792 | 5738.673 | 48987.047 |
| Stem DOF mean | **2823.98** | **8377.72** | **11020.00** | **4439.84** | **2722.72** | **4539.47** | **6851.49** | **8716.44** | **8636.28** | **4647.81** |
| St. deviation | 3280.308 | 4567.266 | 5255.676 | 3535.644 | 2003.323 | 3720.960 | 5300.013 | 5342.240 | 6569.388 | 4514.271 |
| Answer DOF mean | **12005.05** | **10642.35** | **27190.84** | **21546.72** | **5894.23** | **9705.58** | **14093.02** | **48704.95** | **32067.09** | **9218.42** |
| St. deviation | 11402.829 | 12639.367 | 15412.344 | 18641.620 | 3465.961 | 6987.612 | 13024.857 | 27088.734 | 23381.185 | 6419.121 |
| Source NOF mean | **27.16** | **41.23** | **44.70** | **38.05** | **126.63** | **24.49** | **20.58** | **43.67** | **34.09** | **125.28** |
| St. deviation | 16.189 | 21.618 | 23.054 | 24.083 | 172.074 | 13.280 | 14.981 | 22.123 | 20.553 | 158.361 |
| Stem NOF mean | **10.23** | **34.56** | **44.56** | **18.95** | **11.58** | **18.49** | **28.37** | **35.70** | **32.88** | **18.05** |
| St. deviation | 11.493 | 17.890 | 19.253 | 13.377 | 7.847 | 14.754 | 18.802 | 20.442 | 21.162 | 15.689 |
| Answer NOF mean | **44.37** | **43.84** | **106.53** | **82.77** | **21.70** | **35.14** | **54.40** | **187.86** | **127.12** | **35.42** |
| St. deviation | 37.457 | 52.824 | 58.301 | 70.751 | 12.147 | 23.238 | 49.226 | 102.764 | 90.838 | 24.269 |
| Source NOV mean | **6.74** | **7.88** | **9.70** | **8.53** | **5.12** | **7.14** | **6.58** | **8.72** | **7.77** | **5.63** |
| St. deviation | 3.761 | 3.983 | 4.575 | 5.142 | 5.252 | 4.027 | 3.899 | 4.842 | 4.825 | 4.650 |
| Stem NOV mean | **2.60** | **7.26** | **9.58** | **6.00** | **4.21** | **4.09** | **6.47** | **7.47** | **7.02** | **6.12** |
| St. deviation | 2.744 | 4.175 | 5.456 | 3.885 | 2.875 | 3.308 | 3.232 | 4.817 | 4.808 | 4.159 |
| Answer NOV mean | **8.86** | **4.91** | **7.95** | **5.84** | **4.40** | **7.72** | **7.56** | **9.07** | **7.40** | **7.07** |
| St. deviation | 6.906 | 6.003 | 4.498 | 5.300 | 3.118 | 4.506 | 5.667 | 6.734 | 4.499 | 4.345 |
| Source NOS mean | **18.19** | **29.07** | **30.86** | **25.72** | **102.91** | **14.98** | **11.74** | **30.65** | **22.26** | **105.51** |
| St. deviation | 12.252 | 17.396 | 18.765 | 18.639 | 145.331 | 8.911 | 10.000 | 16.580 | 14.291 | 137.214 |
| Stem NOS mean | **6.63** | **23.93** | **30.72** | **11.21** | **6.49** | **12.37** | **18.86** | **24.49** | **22.77** | **10.70** |
| St. deviation | 7.613 | 13.802 | 14.623 | 10.141 | 5.492 | 10.298 | 14.116 | 14.991 | 16.734 | 11.839 |
| Answer NOS mean | **31.79** | **34.14** | **83.86** | **65.00** | **14.88** | **24.26** | **39.58** | **153.42** | **103.40** | **23.98** |
| St. deviation | 29.402 | 41.594 | 48.094 | 58.735 | 8.966 | 18.596 | 37.868 | 84.703 | 77.365 | 18.640 |
| **SA** | Source DOF mean | **9101.06** | **6121.00** | **4721.21** | **7447.72** | **39852.79** | **3817.45** | **4942.24** | **7545.56** | **3114.05** | **39282.61** |
| St. deviation | 7498.755 | 5092.199 | 4197.086 | 7471.854 | 44233.479 | 3648.240 | 8289.427 | 8177.734 | 2770.155 | 30656.718 |
| Stem DOF mean | **6597.50** | **11842.44** | **9056.98** | **7293.72** | **2660.68** | **4839.86** | **11017.02** | **11997.59** | **5107.23** | **2877.81** |
| St. deviation | 6863.846 | 8905.316 | 6410.426 | 6586.602 | 1654.738 | 4609.181 | 8579.987 | 8779.596 | 2685.575 | 4201.462 |
| Answer DOF mean | **19091.32** | **15603.03** | **23809.37** | **24590.12** | **8630.35** | **11103.52** | **14258.10** | **47846.68** | **26650.18** | **9184.69** |
| St. deviation | 14667.729 | 18816.872 | 15805.929 | 19724.423 | 11301.507 | 11133.458 | 14762.237 | 27903.730 | 16480.676 | 12304.514 |
| Source NOF mean | **27.53** | **21.44** | **18.14** | **22.88** | **157.94** | **12.69** | **15.45** | **24.17** | **11.35** | **162.14** |
| St. deviation | 21.659 | 17.578 | 17.470 | 20.423 | 169.786 | 9.960 | 22.197 | 22.365 | 8.254 | 122.914 |
| Stem NOF mean | **25.68** | **49.09** | **38.09** | **29.08** | **12.03** | **19.95** | **45.21** | **50.29** | **22.33** | **10.14** |
| St. deviation | 23.392 | 33.299 | 22.657 | 25.343 | 7.449 | 16.528 | 33.417 | 35.779 | 11.722 | 9.949 |
| Answer NOF mean | **69.59** | **60.21** | **94.93** | **100.04** | **26.91** | **37.69** | **55.07** | **193.73** | **109.65** | **28.92** |
| St. deviation | 51.900 | 70.510 | 63.502 | 81.550 | 33.716 | 35.064 | 55.245 | 115.542 | 71.722 | 38.637 |
| Source NOV mean | **10.32** | **9.21** | **7.44** | **9.04** | **11.65** | **6.17** | **7.43** | **8.66** | **4.75** | **9.53** |
| St. deviation | 7.563 | 4.598 | 6.544 | 7.525 | 15.125 | 3.850 | 9.947 | 5.961 | 3.462 | 6.967 |
| Stem NOV mean | **5.21** | **9.35** | **8.42** | **9.92** | **5.79** | **3.86** | **9.14** | **10.37** | **5.85** | **5.53** |
| St. deviation | 3.930 | 6.471 | 4.782 | 8.376 | 4.013 | 2.385 | 6.867 | 4.974 | 3.286 | 5.321 |
| Answer NOV mean | **13.24** | **7.85** | **10.07** | **11.92** | **8.76** | **9.31** | **11.57** | **13.88** | **7.75** | **7.44** |
| St. deviation | 9.212 | 8.673 | 8.325 | 7.932 | 9.752 | 7.320 | 9.897 | 7.756 | 4.792 | 6.078 |
| Source NOS mean | **12.44** | **9.76** | **8.23** | **10.04** | **119.03** | **5.05** | **6.36** | **11.29** | **4.78** | **127.39** |
| St. deviation | 11.314 | 11.555 | 8.839 | 10.907 | 126.801 | 6.559 | 10.981 | 12.777 | 4.400 | 104.401 |
| Stem NOS mean | **17.06** | **34.41** | **26.42** | **15.28** | **5.32** | **13.88** | **31.00** | **34.95** | **14.88** | **3.89** |
| St. deviation | 15.045 | 25.196 | 18.740 | 14.937 | 4.326 | 13.199 | 24.679 | 29.492 | 10.191 | 4.780 |
| Answer NOS mean | **47.94** | **46.56** | **68.07** | **68.28** | **11.18** | **24.69** | **37.21** | **149.85** | **82.63** | **15.42** |
| St. deviation | 39.800 | 58.275 | 47.287 | 56.330 | 13.374 | 24.202 | 40.690 | 96.045 | 55.996 | 26.444 |

*DOF: Duration of fixations; NOF: Number of fixations; NOV: Number of visits; NOS: Number of saccades.*

**MC Task**

***Directions:*** *There are two passages in this test. Each passage is followed by five questions. For each of them there are four choices marked A), B), C), and D). You should decide on the best choice.*

**Passage 1**

At the heart of the debate over illegal immigration lies one key question: are immigrants good or bad for the economy? The American public overwhelmingly thinks they’re bad. Yet the consensus among most economists is that immigration, both legal and illegal, provides a small net boost to the economy. Immigrants provide cheap labor, lower the prices of everything from farm produce to new homes, and leave consumers with a little more money in their pockets. So why is there such a discrepancy between the perception of immigrants’ impact on the economy and the reality?

There are a number of familiar theories. Some argue that people are anxious and feel threatened by an inflow of new workers. Others highlight the strain that undocumented immigrants place on public services, like schools, hospitals, and jails. Still others emphasize the role of race, arguing that foreigners add to the nation’s fears and insecurities. There’s some truth to all these explanations, but they aren’t quite sufficient.

To get a better understanding of what’s going on, consider the way immigration’s impact is felt. Though its overall effect may be positive, its costs and benefits are distributed unevenly. David Card, an economist at UC Berkeley, notes that the ones who profit most directly from immigrants’ low-cost labor are businesses and employers—meatpacking plants in Nebraska, for instance, or agricultural businesses in California. Granted, these producers’ savings probably translate into lower prices at the grocery store, but how many consumers make that mental connection at the checkout counter? As for the drawbacks of illegal immigration, these, too, are concentrated. Native low-skilled workers suffer most from the competition of foreign labor. According to a study by George Borjas, a Harvard economist, immigration reduced the wages of American high-school dropouts by 9% between 1980-2000.

Among high-skilled, better-educated employees, however, opposition was strongest in states with both high numbers of immigrants and relatively generous social services. What worried them most, in other words, was the fiscal burden of immigration. That conclusion was reinforced by another finding: that their opposition appeared to soften when that fiscal burden decreased, as occurred with welfare reform in the 1990s, which curbed immigrants’ access to certain benefits.

The irony is that for all the overexcited debate, the net effect of immigration is minimal. Even for those most acutely affected—say, low-skilled workers, or California residents—the impact isn’t all that dramatic. “The unpleasant voices have tended to dominate our perceptions,” says Daniel Tichenor, a political science professor at the University of Oregon. “But when all those factors are put together and the economists calculate the numbers, it ends up being a net positive, but a small one.” Too bad most people don’t realize it.

1. The underlined word “discrepancy” in the first paragraph most probably means ____________.

A) difference B) debate C) mistake D) unlikeliness

2. The author thinks that native Americans benefit from immigration through ____________.

A) enjoying more public services B) getting lower-priced goods

C) experiencing different cultures D) doing less manual work

3. Native high-skilled, better-educated employees’ chief concern about the inflow of immigrants is ____________.

A) social structure change B) threat to economic status

C) social instability D) strain on budget

4. The irony about the debate over immigration is that people ____________.

A) do not agree about its impact B) benefit from it

C) make a fuss over a trifle D) agree about its impact

5. The passage is mainly about ____________.

1. immigration history B) impact of immigration
2. immigration economy D) opposition to immigration

**Passage 2**

The use of respectful language is symbolic of the Confucian ideal of the woman, which dominates conservative gender norms in Japan. This ideal presents a woman who withdraws quietly to the background, subordinating her life and needs to those of her family and its male head. She is a dutiful daughter, wife, and mother, master of the domestic arts. The typical refined Japanese woman excels in modesty and delicacy; she “treads softly in the world,” elevating feminine beauty and grace to an art form.

Nowadays, it is commonly observed that young women are not conforming to the feminine linguistic ideal. They are using fewer of the very respectful “women’s” forms, and even using the few strong forms that are known as “men’s”. This, of course, attracts considerable attention and has led to an outcry in the Japanese media against the defeminization of women’s language. Indeed, we didn’t hear about “men’s language” until people began to respond to girls’ appropriation of forms normally reserved for boys and men. There is considerable sentiment about the “corruption” of women’s language—which of course is viewed as part of the loss of feminine ideals and morality—and this sentiment is crystallized by nationwide opinion polls that are regularly carried out by the media.

Yoshiko Matsumoto has argued that young women probably never used as many of the highly respectful forms as older women. This highly polite style is no doubt something that young women have been expected to “grow into”—after all, it is a sign not simply of femininity, but of maturity and refinement, and its use could be taken to indicate a change in the nature of one’s social relations as well. One might well imagine little girls using exceedingly polite forms when playing house or imitating older women—in a fashion analogous to little girls’ use of a high-pitched voice to do “teacher talk” or “mother talk” in role play.

The fact that young Japanese women are using less respectful language is a sure sign of change—of social change and of linguistic change. But it is most certainly not a sign of the “masculization” of girls. In some instances, it may be a sign that girls are making the same claim to authority as boys and men, but that is very different from saying that they are trying to be “masculine.” Katsue Reynolds has argued that girls nowadays are using more assertive language strategies in order to be able to compete with boys in schools and out. Social change also brings not simply different positions for women and girls, but different relations to life stages, and adolescent girls are participating in new subcultural forms. Thus what may, to an older speaker, seem like “masculine” speech may seem to an adolescent like “liberated” or “hip” speech.

6. The underlined phrase “conforming to” in the second paragraph most probably means ____________.

A) approving B) ensuring C) following D) liberating

7. Some people take ____________ attitudes toward women’s appropriation of men’s language forms.

A) negative B) positive C) sentimental D) indifferent

8. According to Yoshiko Matsumoto, the linguistic behavior observed in today’s young women is the result of ____________.

A) worsening women status B) past generation behaviors

C) women’s maturity D) rapid social progress

9. The author believes that Japanese girls use assertive language in order to ____________.

A) show their maturation B) express their defiance

C) compete with boys D) indicate linguistic development

10. The best title for this passage is____________.

A) Japanese New Females B) Japanese Role Model

C) Japanese Cultural Change D) Japanese Women’s Status

**SA Task**

***Directions:*** *There are two passages in this test. Each passage is followed by five short answer questions. Answer the questions with* ***NO MORE THAN FIVE WORDS*** *in the space provided. (答案超过3个单词不给分)*

**Passage 1**

At the heart of the debate over illegal immigration lies one key question: are immigrants good or bad for the economy? The American public overwhelmingly thinks they’re bad. Yet the consensus among most economists is that immigration, both legal and illegal, provides a small net boost to the economy. Immigrants provide cheap labor, lower the prices of everything from farm produce to new homes, and leave consumers with a little more money in their pockets. So why is there such a discrepancy between the perception of immigrants’ impact on the economy and the reality?

There are a number of familiar theories. Some argue that people are anxious and feel threatened by an inflow of new workers. Others highlight the strain that undocumented immigrants place on public services, like schools, hospitals, and jails. Still others emphasize the role of race, arguing that foreigners add to the nation’s fears and insecurities. There’s some truth to all these explanations, but they aren’t quite sufficient.

To get a better understanding of what’s going on, consider the way immigration’s impact is felt. Though its overall effect may be positive, its costs and benefits are distributed unevenly. David Card, an economist at UC Berkeley, notes that the ones who profit most directly from immigrants’ low-cost labor are businesses and employers—meatpacking plants in Nebraska, for instance, or agricultural businesses in California. Granted, these producers’ savings probably translate into lower prices at the grocery store, but how many consumers make that mental connection at the checkout counter? As for the drawbacks of illegal immigration, these, too, are concentrated. Native low-skilled workers suffer most from the competition of foreign labor. According to a study by George Borjas, a Harvard economist, immigration reduced the wages of American high-school dropouts by 9% between 1980-2000.

Among high-skilled, better-educated employees, however, opposition was strongest in states with both high numbers of immigrants and relatively generous social services. What worried them most, in other words, was the fiscal burden of immigration. That conclusion was reinforced by another finding: that their opposition appeared to soften when that fiscal burden decreased, as occurred with welfare reform in the 1990s, which curbed immigrants’ access to certain benefits.

The irony is that for all the overexcited debate, the net effect of immigration is minimal. Even for those most acutely affected—say, low-skilled workers, or California residents—the impact isn’t all that dramatic. “The unpleasant voices have tended to dominate our perceptions,” says Daniel Tichenor, a political science professor at the University of Oregon. “But when all those factors are put together and the economists calculate the numbers, it ends up being a net positive, but a small one.” Too bad most people don’t realize it.

1. What does the underlined word “discrepancy” mean in the first paragraph?

2. What do native Americans benefit from immigration, according to the author?

3. What do native high-skilled, better-educated employees worry about the inflow of immigrants?

4. Why is the debate over immigration ironic?

5. What is the passage mainly about?

**Passage 2**

The use of respectful language is symbolic of the Confucian ideal of the woman, which dominates conservative gender norms in Japan. This ideal presents a woman who withdraws quietly to the background, subordinating her life and needs to those of her family and its male head. She is a dutiful daughter, wife, and mother, master of the domestic arts. The typical refined Japanese woman excels in modesty and delicacy; she “treads softly in the world,” elevating feminine beauty and grace to an art form.

Nowadays, it is commonly observed that young women are not *conforming to* the feminine linguistic ideal. They are using fewer of the very respectful “women’s” forms, and even using the few strong forms that are known as “men’s”. This, of course, attracts considerable attention and has led to an outcry in the Japanese media against the defeminization of women’s language. Indeed, we didn’t hear about “men’s language” until people began to respond to girls’ appropriation of forms normally reserved for boys and men. There is considerable sentiment about the “corruption” of women’s language—which of course is viewed as part of the loss of feminine ideals and morality—and this sentiment is crystallized by nationwide opinion polls that are regularly carried out by the media.

Yoshiko Matsumoto has argued that young women probably never used as many of the highly respectful forms as older women. This highly polite style is no doubt something that young women have been expected to “grow into”—after all, it is a sign not simply of femininity, but of maturity and refinement, and its use could be taken to indicate a change in the nature of one’s social relations as well. One might well imagine little girls using exceedingly polite forms when playing house or imitating older women—in a fashion analogous to little girls’ use of a high-pitched voice to do “teacher talk” or “mother talk” in role play.

The fact that young Japanese women are using less respectful language is a sure sign of change—of social change and of linguistic change. But it is most certainly not a sign of the “masculization” of girls. In some instances, it may be a sign that girls are making the same claim to authority as boys and men, but that is very different from saying that they are trying to be “masculine.” Katsue Reynolds has argued that girls nowadays are using more assertive language strategies in order to be able to compete with boys in schools and out. Social change also brings not simply different positions for women and girls, but different relations to life stages, and adolescent girls are participating in new subcultural forms. Thus what may, to an older speaker, seem like “masculine” speech may seem to an adolescent like “liberated” or “hip” speech.

6. What does the underlined phrase “conforming to” mean in the second paragraph?

7. What attitude do some people take toward women’s appropriation of men’s language forms?

8. Why is the linguistic behavior observed in today’s young women, according to Yoshiko Matsumoto?

9. Why do Japanese girls use assertive language, according to the author?

10. Give a title for the passage.
